# Supplementary material for: Increasing donor kidney age significantly aggravates the negative effect of pretransplant donor-specific anti-HLA antibodies on kidney graft survival
Source: Frontiers journal article supplement (doi:10.3389/fimmu.2025.1574324), 2025-04-16
Supplement: Data_Sheet_1.pdf [file Data_Sheet_1.pdf]

Table 1 supplement

The hazard ratio's for graft failure within different categories of pre-transplant DSA as compared to recipients without pre-transplant DSA and other clinical variables , analyzed per donor age group.

| Donor age group    | significant variables within the multivariate Cox proportional hazard analysis |                          |
|--------------------|--------------------------------------------------------------------------------|--------------------------|
|                    | Variables in the equation                                                      | Hazard ratio with 95% CI |
| <45 years          | DSA anti-HLA class I only*                                                     | 5.8 (1.9-17.5)           |
|                    | DSA anti-HLA class II only*                                                    | 7.4 (3.4-16.2)           |
|                    | DSA anti-HLA class I and II*                                                   | 29.4 (12.9-66)           |
|                    | Age recipient per year older                                                   | 0.97 (0.95-0.99)         |
|                    | LD vs DD kidney                                                                | 0.45 (0.24-0.85)         |
|                    | no PRA vs PRA positive                                                         | 0.29 (0.12 -0.70)        |
|                    |                                                                                |                          |
| 45-54 years        | DSA anti-HLA class I only                                                      | 2.7 (0.6-11.2)           |
|                    | DSA anti-HLA class II only                                                     | 4.4 (2.2-9.1)            |
|                    | DSA anti-HLA class I and II                                                    | 18.0 (10.2-31.9)         |
|                    | LD vs DD kidney                                                                | 0.45 (0.27-0.76)         |
| 55-64 years        | DSA anti-HLA class I only                                                      | 5.5 (2.6-11.6)           |
|                    | DSA anti-HLA class II only                                                     | 5.4 (3.4-8.8)            |
|                    | DSA anti-HLA class I and II                                                    | 13.1(8.3-20.8)           |
|                    | LD vs DD kidney                                                                | 0.36 (0.25-0.53)         |
| 65 years and older | DSA anti-HLA class I only                                                      | 6.5 (2.4-18.2)           |
|                    | DSA anti-HLA class II only                                                     | 5.3 (3.0-9.1)            |
|                    | DSA anti-HLA class I and II                                                    | 15.9 (9.3-27.2)          |
|                    | Age donor kidney per year older                                                | 1.05 (1.01-1.10)         |
|                    | LD vs DD kidney                                                                | 0.44 (0.29-0.67)         |

Within the defined donor age group, a multivariate Cox proportional hazard analysis was performed including the clinically relevant variables that had a  $p < 0.1$  in the univariate Cox proportional hazard analysis. The variables which remained within the equation after stepwise forward conditional analysis are given. \*The categories of pre-transplant donor-specific antibodies (DSA) were defined as anti-HLA class I only, anti-HLA class II only, or the presence of both anti-HLA class I and II before transplantation and the hazard ratio's are given compared to no pre-transplant DSA. Living donor kidney (LD); deceased donor kidney (DD); panel reactive antibodies (PRA) are considered positive when  $>5\%$

\*
